# Supplementary material
Source: publisher figshare collection journal article supplement (https://acs.figshare.com/ndownloader/files/3848221)
Supplement: Supplementary file 1 [file 3848221]

## **Supporting Information (SI)**

# **Spontaneous Nematic Alignment of a Lipid Nanotube in Aqueous Solutions**

Wuxiao Ding, Hiroyuki Minamikawa,\* Naohiro Kameta, Momoyo Wada, Mitsutoshi Masuda,  
and Toshimi Shimizu

Nanosystem Research Institute, National Institute of Advanced Industrial Science and  
Technology (AIST), Tsukuba Central 5, 1-1-1 Higashi, Tsukuba, Ibaraki 305-8565 Japan

\* Tel: +81-29-861-9386; Fax: +81-29-861-4545. E-mail address:  
hiroyuki.minamikawa@aist.go.jp

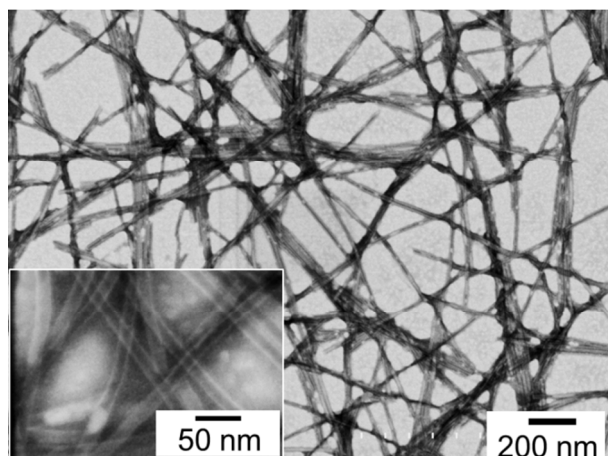

**Figure S1.** STEM images of the dried LNT on a carbon grid. The sample was heated on a hot plate for 10 min at 170 °C. The staining and STEM observation were conducted at RT.

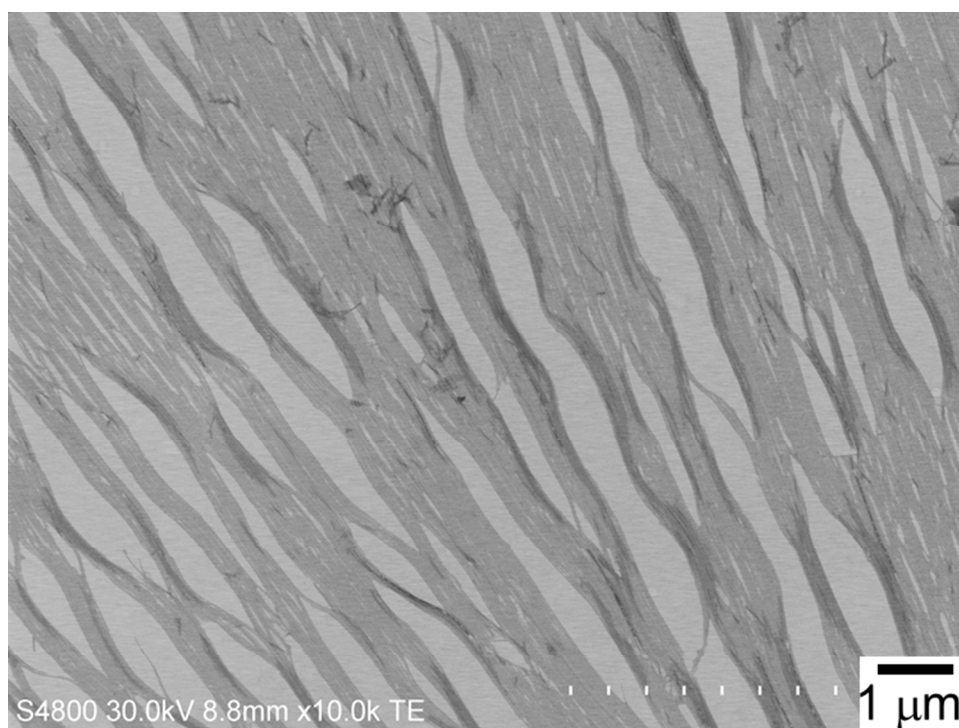

**Figure S2.** Low-magnification STEM image of the dried LNT from a 2-mg/mL dispersion on a carbon grid.

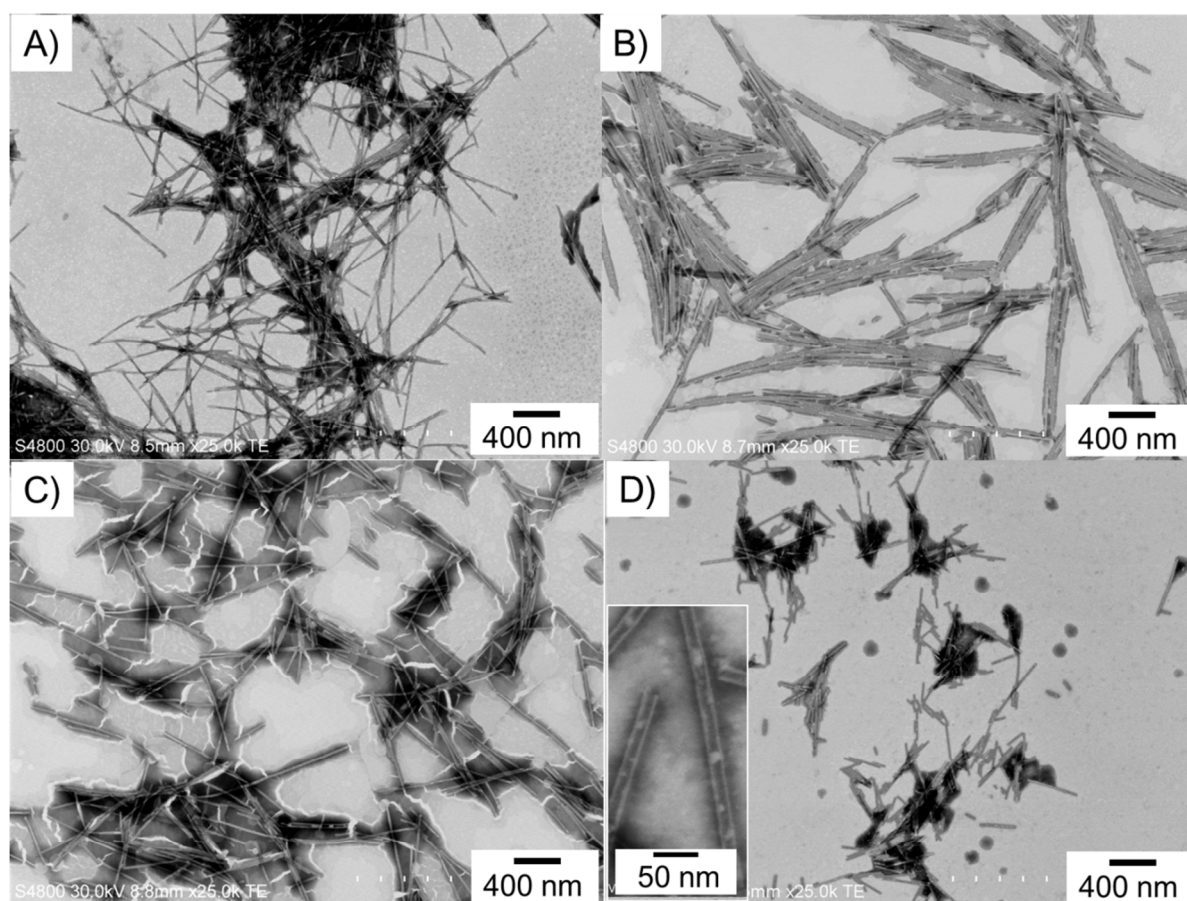

**Figure S3.** STEM images of sonication-treated LNT. The sonication duration times were A) 5 s, B) 10 s, C) 20 s, and D) 30 s.

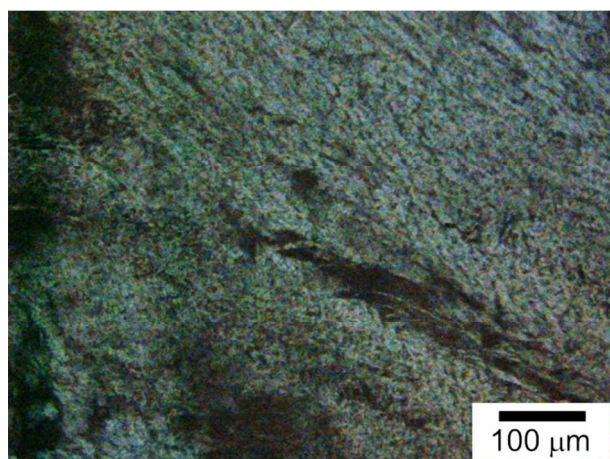

**Figure S4.** LC domain of a short LNT dispersion (10-s sonication treatment, 10 mg/mL). An aqueous sample on a glass slide was observed by polarized optical microscopy.

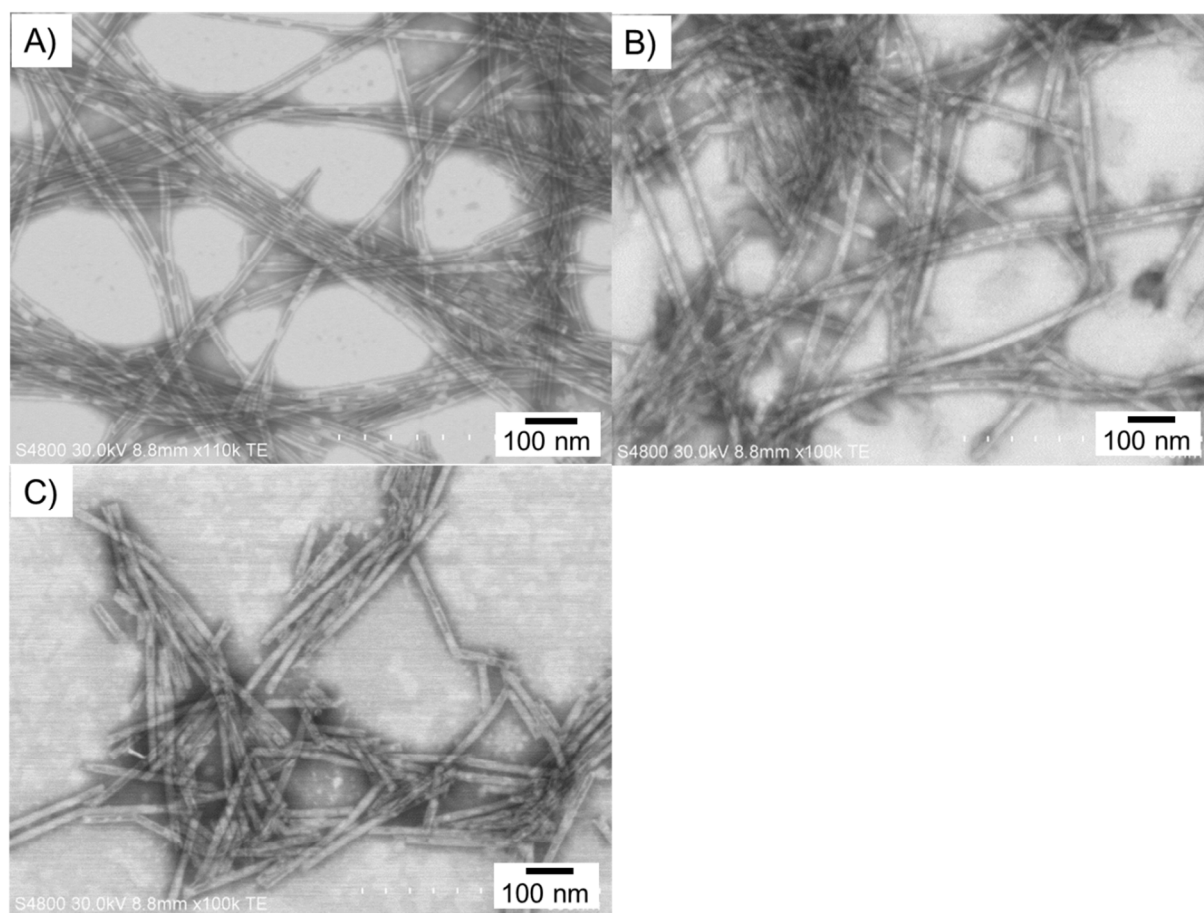

**Figure S5:** STEM images of LNTs in **A)** water/ethanol = 1/1 (v/v), **B)** water/acetone = 1/1 (v/v), **C)** water/tetrahydrofuran = 1/1 (v/v) at room temperature.

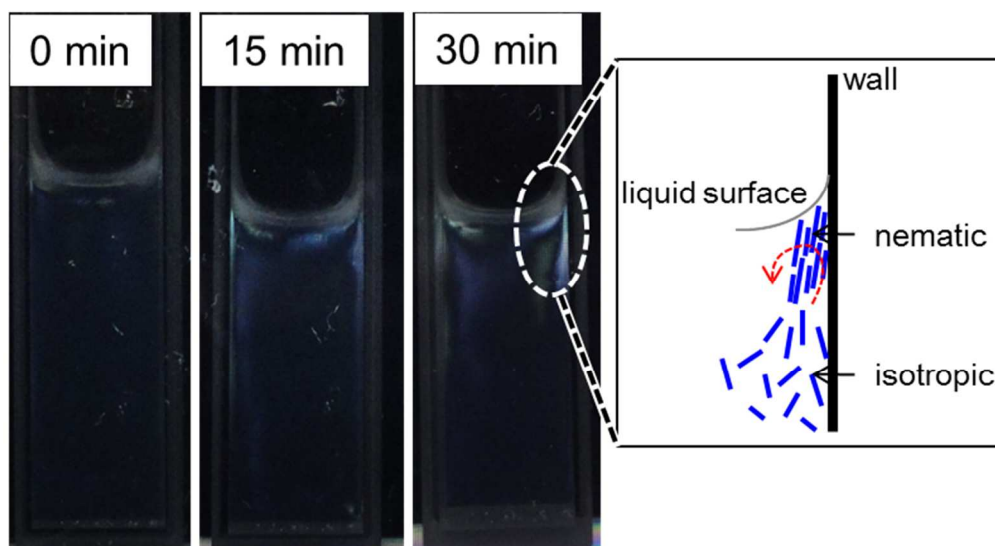

**Figure S6:** The phenomenon “tears of wine” of LNT in water/ethanol = 1/1 (v/v). The LNT was dispersed at 1 mg/mL (isotropic phase) in the mixture solvent. The dispersion was put into a cuvette and allowed for the evaporation of ethanol at room temperature for 15 min and 30 min. Photos were taken with crossed polarizers.

At 0 min, the LNT dispersion was isotropic. After 15 and 30 min a nematic phase appeared at the top of dispersion and near the cuvette wall (see the schematic image). This experiment suggested that LNT may be simply aligned by the evaporation process.
